# Supplementary material for: Present but Absent in the Digital Age: Testing a Conceptual Model of Phubbing and Relationship Satisfaction among Married Couples
Source: Hindawi journal article supplement (doi:10.1155/2022/1402751), 2022-01-31

Appendix I

Table 1.

*The relationship between different types of addiction and phubbing*.

|  |  | Unstandardized Coefficients | | Standardized Coefficients | *t* | Sig. | Collinearity Statistics | |
| --- | --- | --- | --- | --- | --- | --- | --- | --- |
|  | Constant | *B* | Std. Error | Beta |  |  | Tolerance | VIF |
| Mobile Addiction | 0.665 | 0.821 | 0.026 | 0.779 | 32.107 | 0.000 | 0.870 | 1.149 |
| Internet Addiction | 1.338 | 0.655 | 0.025 | 0.700 | 26.134 | 0.000 | 0.888 | 1.126 |
| Social Media Addiction | 1.119 | 0.727 | 0.029 | 0.680 | 24.764 | 0.000 | 0.888 | 1.126 |
| Gaming Addiction | 2.078 | 0.512 | 0.022 | 0.649 | 23.378 | 0.000 | 0.917 | 1.091 |
| SMS Addiction | 1.847 | 0.589 | 0.026 | 0.637 | 22.217 | 0.000 | 0.894 | 1.118 |
|  |  |  |  |  |  |  |  |  |

**Figure Ia**. Histogram of standardized residuals for regression on phubbing by cell phone addiction


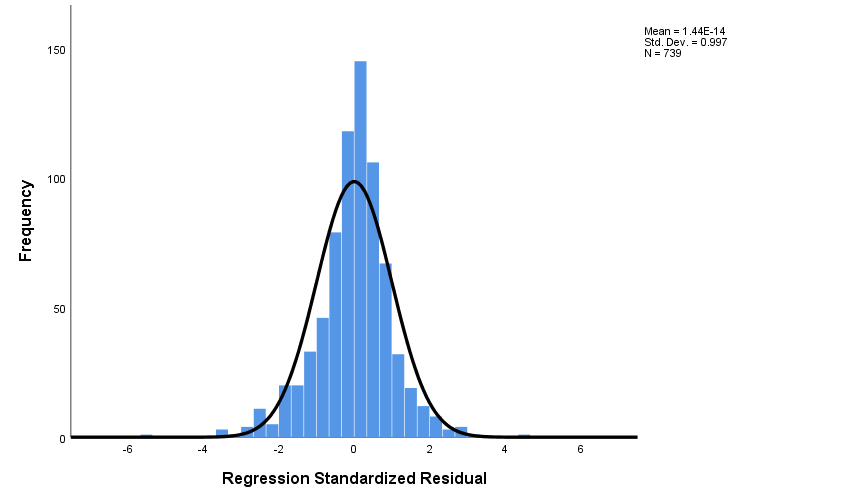


**Figure Ib**. Normal P-P Plot of regression standardized residual for regression on phubbing by cell phone addiction


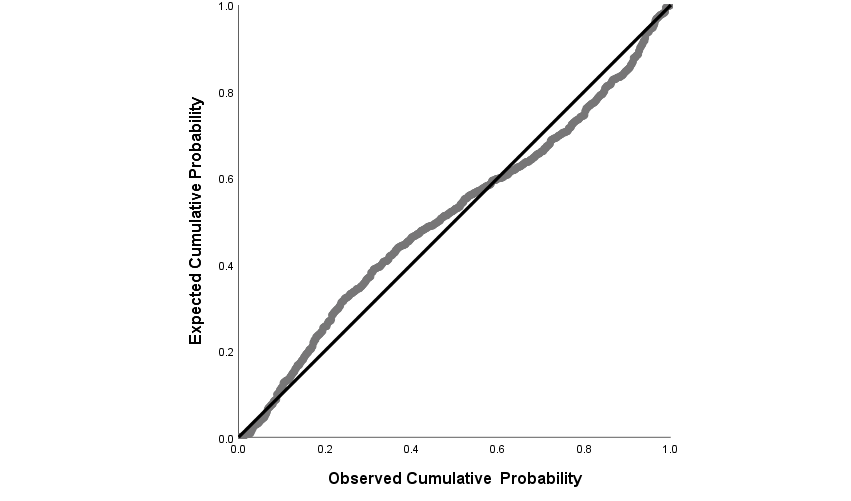


**Figure Ic**. Scatterplot of standardized predicted values for regression on phubbing by cell phone addiction


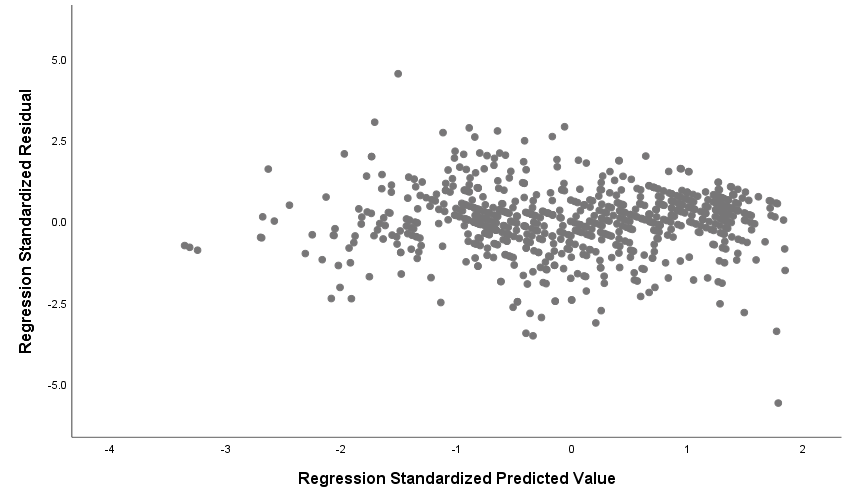


Appendix II

**Figure IIa**. Histogram of standardized residuals for regression on phubbing by internet addiction


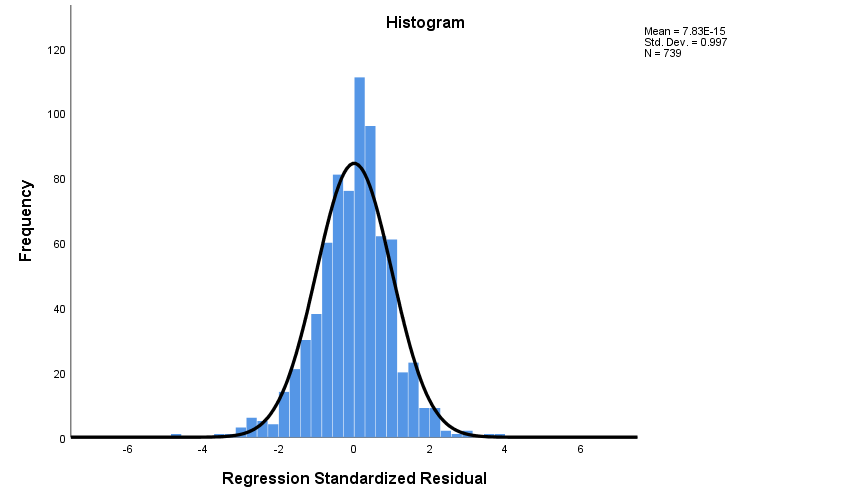


**Figure IIb**. Normal P-P Plot of regression standardized residual for regression on phubbing by internet addiction


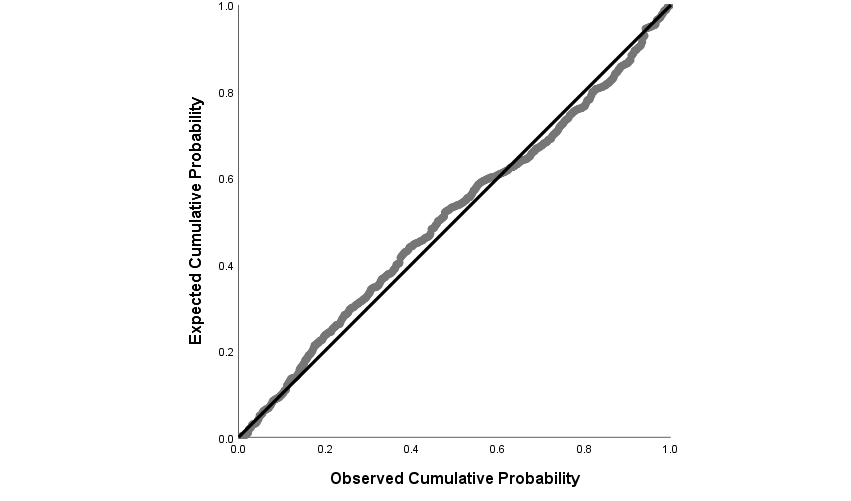


**Figure IIc**. Scatterplot of standardized predicted values for regression on phubbing by internet addiction


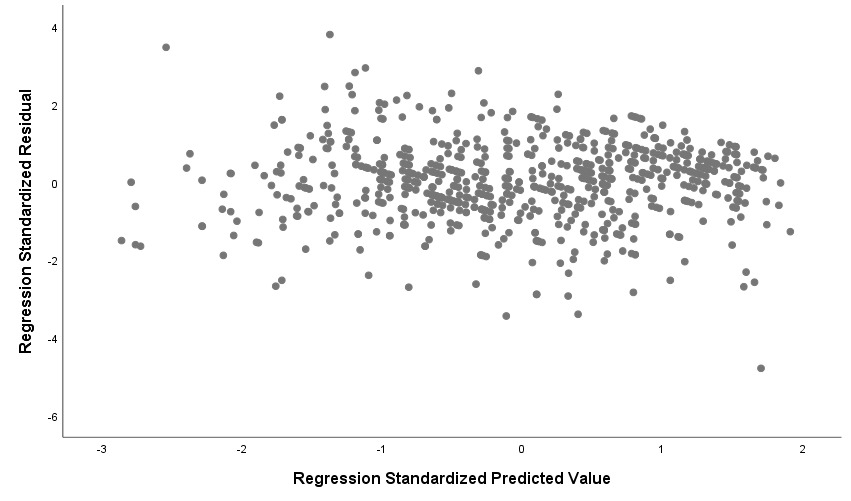


Appendix III

**Figure IIIa.** Histogram of standardized residuals for regression on phubbing by social media addiction


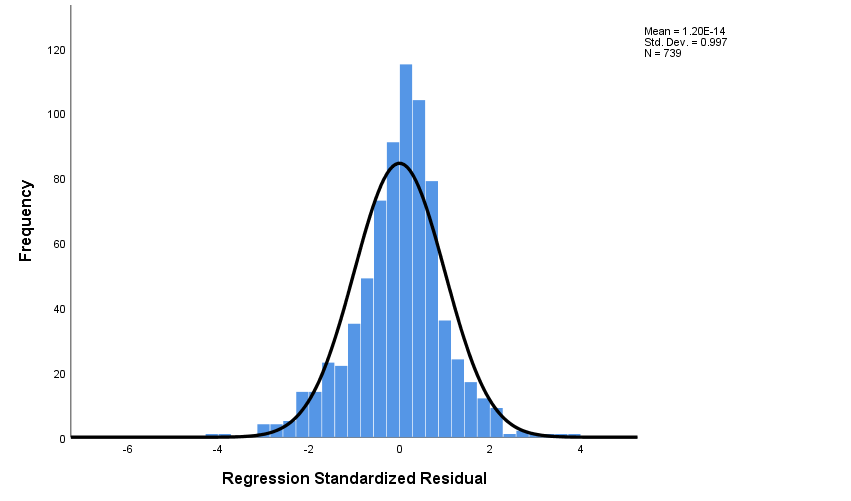


**Figure IIIb**. Normal P-P Plot of regression standardized residual for regression on phubbing by social media addiction


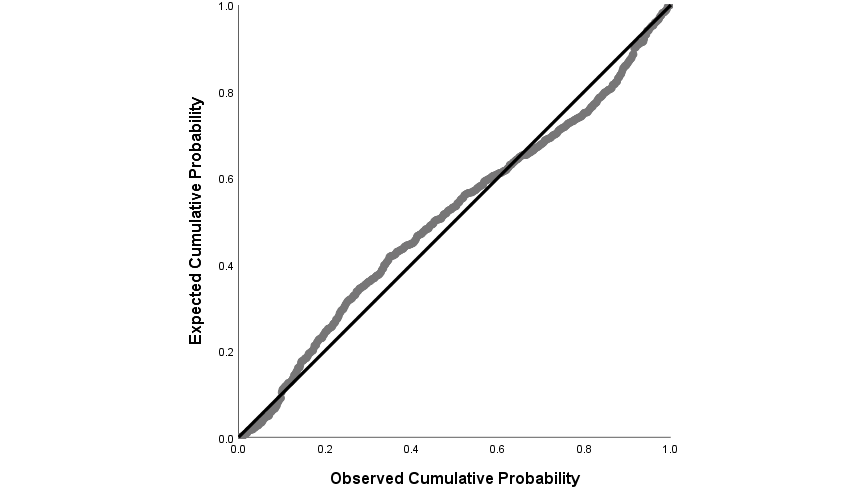


**Figure IIIc**. Scatterplot of standardized predicted values for regression on phubbing by social media addiction


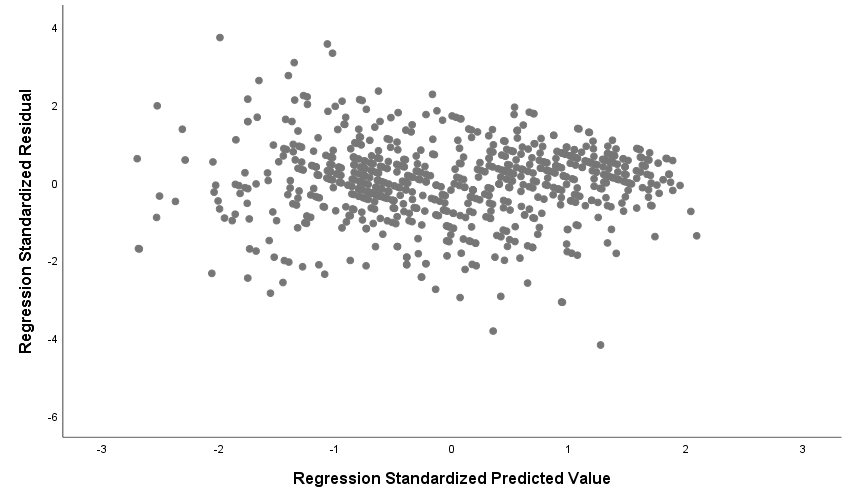


Appendix IV

**Figure IVa**. Histogram of standardized residuals for regression on phubbing by gaming addiction


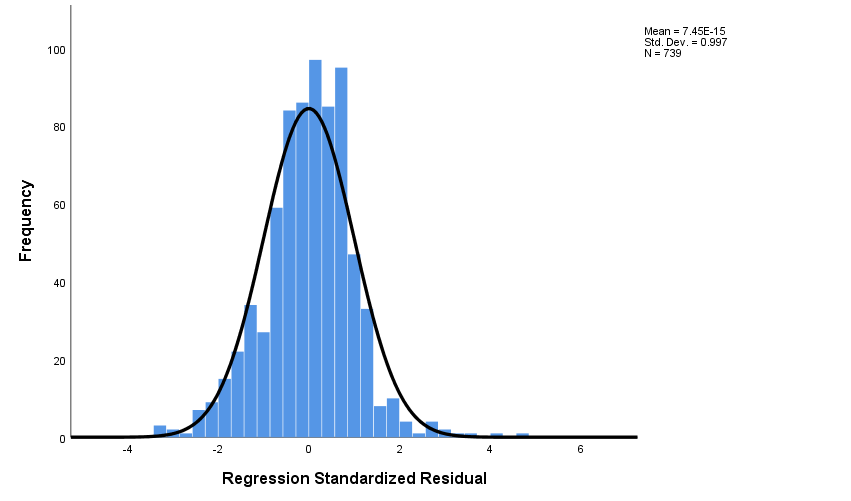


**Figure IVb**. Normal P-P Plot of regression standardized residual for regression on phubbing by gaming addiction


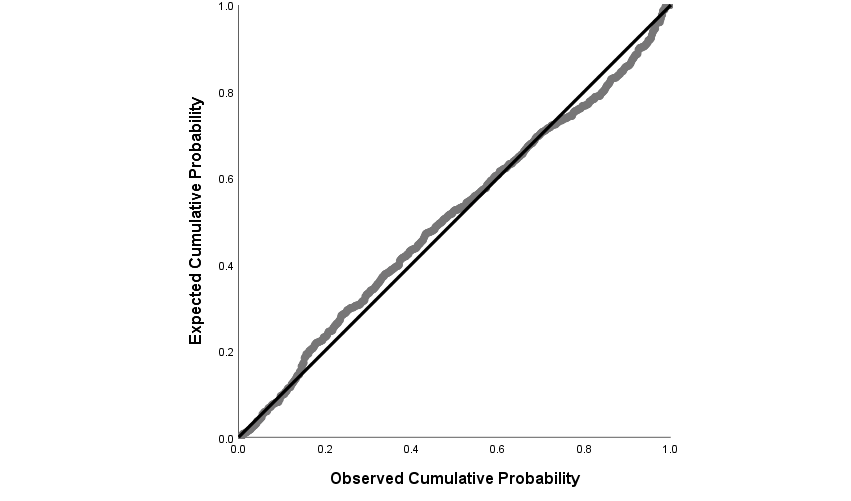


**Figure IVc**. Scatterplot of standardized predicted values for regression on phubbing by gaming addiction


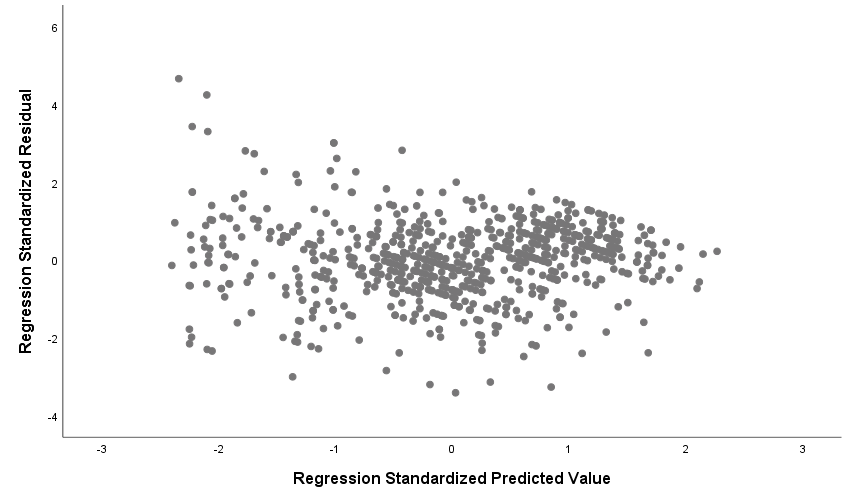


Appendix V

**Figure Va**. Histogram of standardized residuals for regression on phubbing by SMS addiction


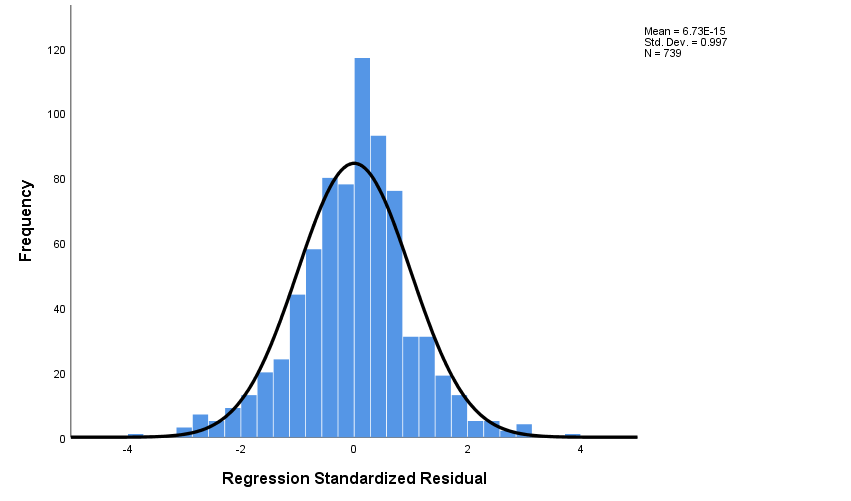


**Figure Vb**. Normal P-P Plot of regression standardized residual for regression on phubbing by SMS addiction


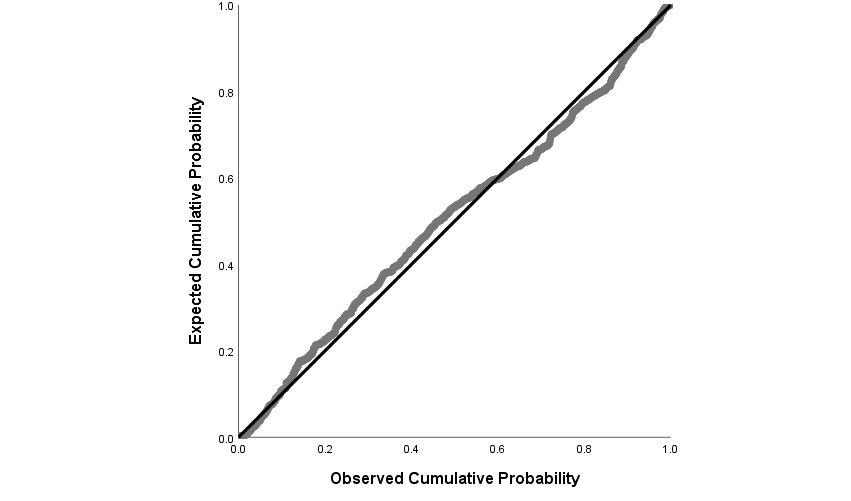


**Figure Vc.** Scatterplot of standardized predicted values for regression on phubbing by SMS addiction


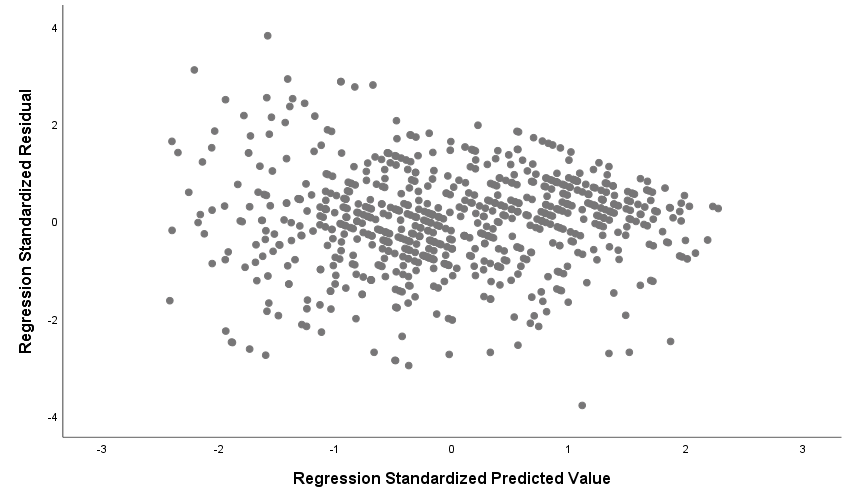


Appendix VI

**Figure VIa**. Histogram of standardized residuals for regression on participant relationship satisfaction by phubbing moderated by gender and relationship length


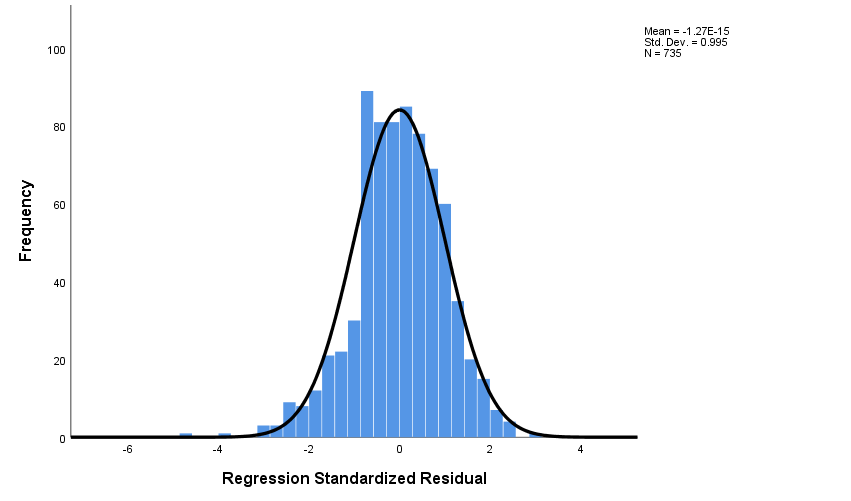


**Figure VIb**. Normal P-P Plot of regression standardized residual for regression on participant relationship satisfaction by phubbing moderated by gender and relationship length


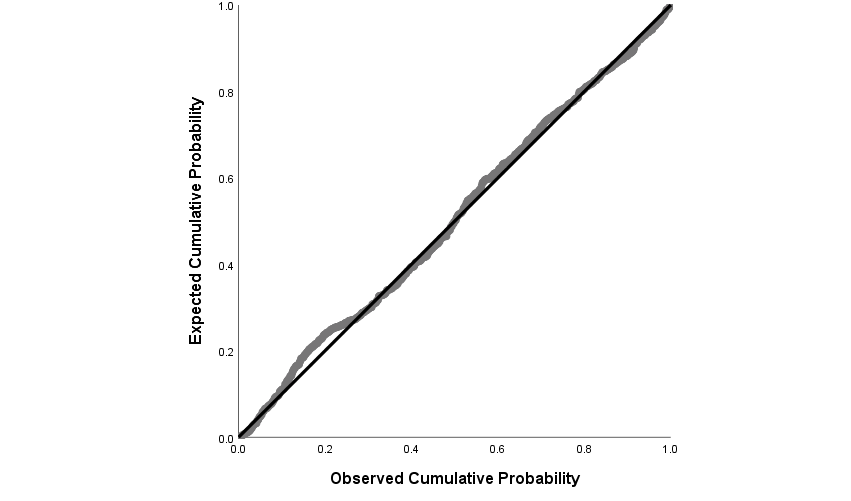


**Figure VIc**. Scatterplot of standardized predicted values for regression on participant relationship satisfaction by phubbing moderated by gender and relationship length


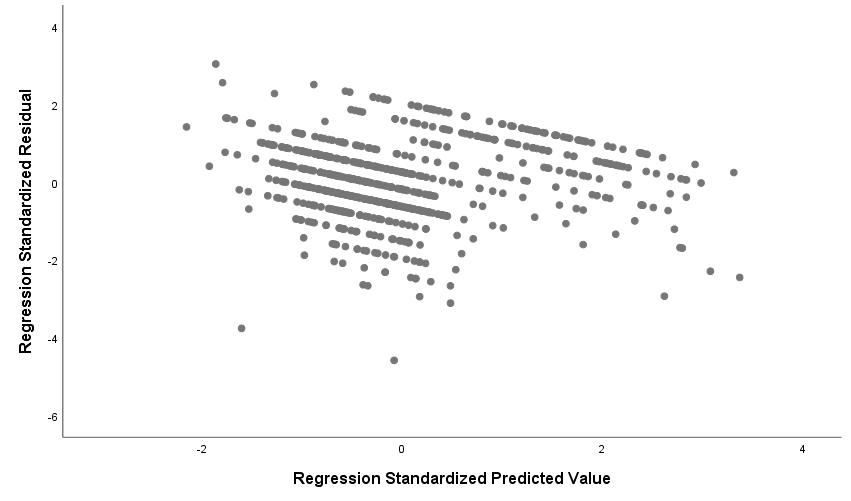


Appendix VII

**Figure VIIa**. Histogram of standardized residuals for regression on partner relationship satisfaction by phubbing moderated by gender and relationship length


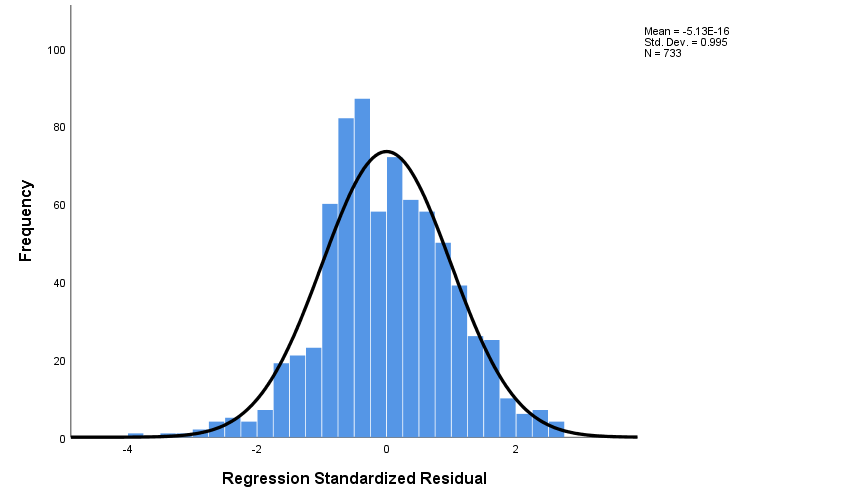


**Figure VIIb**. Normal P-P Plot of regression standardized residual for regression on partner relationship satisfaction by phubbing moderated by gender and relationship length


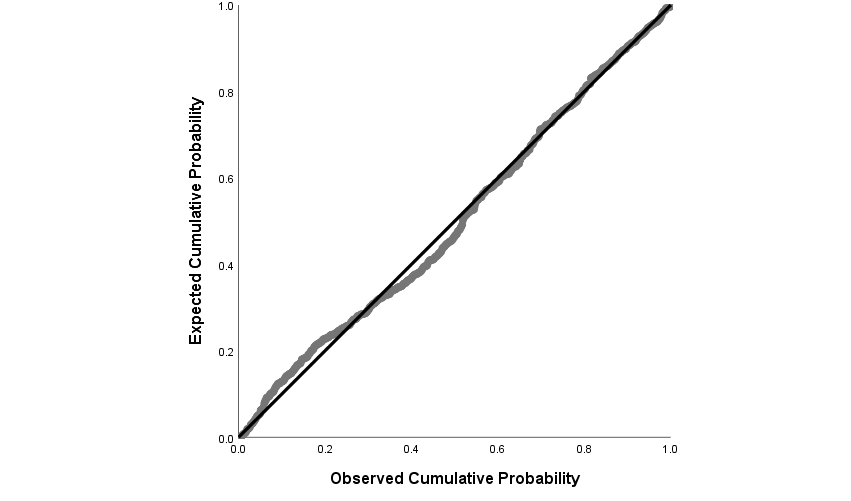


**Figure VIIc**. Scatterplot of standardized predicted values for regression on participant relationship satisfaction by phubbing moderated by gender and relationship length


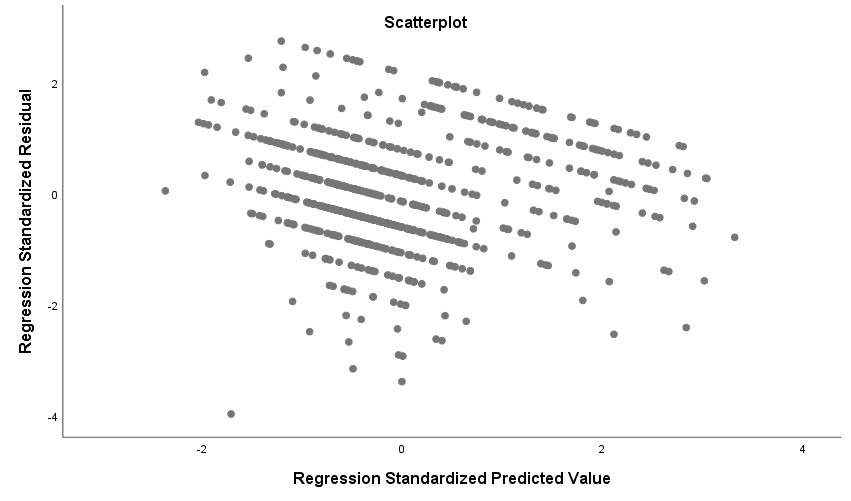

Supplement: f1 [file 1402751.f1.docx]
